# Supplementary material for: NSCLC cells acquire resistance to AZD9291 by reducing CAMSAP3
Source: Research Square preprint supplement (doi:10.21203/rs.3.rs-6539573/v1), 2025-05-21
Supplement: Supplementary file 2 [file 84c6f1a74cd6abea03d7e110.docx]

**Supplementary Table S1. The primers used for real-time PCR.**

| Gene | | Sequences (5’-3’) | |
| --- | --- | --- | --- |
| *CAMSAP3* | Forward | | CACCATCCACTGCTATTGTCCC |
| *CAMSAP3* | Reverse | | AATCCTGCACGAGCTGGAGGTT |
| *CAMSAP2* | Forward | | GGAGGTCAAAAGGCTCGTTATCG |
| *CAMSAP2* | Reverse | | GGCAGCTAATGCACAGCCATCT |
| *CAMSAP1* | Forward | | ACCCGAGTTGATGGTCAGCCTC |
| *CAMSAP1* | Reverse | | CACAACTCGCAGCGTGATGTAG |
| *NINEIN* | Forward | | AGAGTGCTCAGGCTTCCGTTGA |
| *NINEIN* | Reverse | | ATGACCAGCTCTGCCTCAATGC |
| *SPAST* | Forward | | CTCTTTGGTCCACCTGGGAATG |
| *SPAST* | Reverse | | GCCACAGCAAAAAGAGCCCTCA |
| *KATNA1* | Forward | | GTGCGGACATTACCAACGTGTG |
| *KATNA1* | Reverse | | CCTCCATAGTTGTAGGCATGTGC |
| *TPX2* | Forward | | TTCAAGGCTCGTCCAAACACCG |
| *TPX2* | Reverse | | GCTCTCTTCTCAGTAGCCAGCT |
| *TPPP* | Forward | | TGACCGTCACTGACGTGGACAT |
| *TPPP* | Reverse | | CGCTGCTCTTGTCTTTGAATCGC |
| *AURKA* | Forward | | GCAACCAGTGTACCTCATCCTG |
| *AURKA* | Reverse | | AAGTCTTCCAAAGCCCACTGCC |
| *CDK5RAP2* | Forward | | ACCGATCAACACTGCACTCAGC |
| *CDK5RAP2* | Reverse | | GGATTGGCAAGCGGGACTTCTT |
| *MZT1* | Forward | | GTGTACGGCTTTGTGAACAAGGA |
| *MZT1* | Reverse | | GAATTTCTCCAGAAAGTCAGCTTG |
| *AKAP9* | Forward | | GGCGTCATTGATGGCTATGCAG |
| *AKAP9* | Reverse | | GCTGTTGCTCTGCCTCCAATTC |
| *FSD1* | Forward | | TCAAGACCAGGTTCACACAGCC |
| *FSD1* | Reverse | | CTGGTAGCACTGCCTCGCTTTT |
| *WDR8* | Forward | | GGCACTGCAAAATAGACGAGGG |
| *WDR8* | Reverse | | CACAAGGACCAGACGGTTATCC |
| *SSX2IP* | Forward | | GACTTTTGCCAGACACGTTCCTG |
| *SSX2IP* | Reverse | | AGGTCTTGACGCCACACTCCAT |
| *CLIP170* | Forward | | AGAAGACGCTGCTGGACACAGA |
| *CLIP170* | Reverse | | TGGCATCTTCCGCTGTTTGAGC |
| *RAC1* | Forward | | CGGTGAATCTGGGCTTATGGGA |
| *RAC1* | Reverse | | GGAGGTTATATCCTTACCGTACG |
| *CDC42* | Forward | | TGACAGATTACGACCGCTGAGTT |
| *CDC42* | Reverse | | GGAGTCTTTGGACAGTGGTGAG |
| *IQGAP1* | Forward | | CCGTGGATACTTAGTTCGACAGG |
| *IQGAP1* | Reverse | | AGCGCAGGTAAGCTAACCGATC |
| *TUBG1* | Forward | | CACTCAAGAGGCTGACGCAGAA |
| *TUBG1* | Reverse | | GGTTGATCTGGGAGAAGGATGG |
| *TUBG2* | Forward | | TACCTCCTGGAGCGACTGAATG |
| *TUBG2* | Reverse | | GCTGAACCACTACGTCGCTCAT |
| *TUBGCP2* | Forward | | TACTCCGCTGTGACCAGGTTCA |
| *TUBGCP2* | Reverse | | CCAGAATCAGGTGCTCCTTCAC |
| *TUBGCP3* | Forward | | TAGTGGACCACTGCCAAGGAAG |
| *TUBGCP3* | Reverse | | GATGAGACACGAGGCTGAGGAT |
| *TUBGCP4* | Forward | | CTTGGTGGACTTTGAACAGGTGG |
| *TUBGCP4* | Reverse | | GCCTGAAACAGTTCTCCACGTC |
| *TUBGCP5* | Forward | | GATGCAGTCCATTGCTGAAAGCC |
| *TUBGCP5* | Reverse | | CTCGTGAAAGTCACTCTGCTCC |
| *TUBGCP6* | Forward | | GGTGTTCAGAGACGCTTATGGC |
| *TUBGCP6* | Reverse | | CCACCTCTTTGGAGATGAGCAC |
| *MATCAP* | Forward | | GCCATATTGCCAGCAAGAGC |
| *MATCAP* | Reverse | | ATCGATGGTCTGGCGATGTC |
| *NEDD1* | Forward | | GCTCTTTGTAACCATAGGCTTGG |
| *NEDD1* | Reverse | | CCAAAGTGGCTCCATCAGGCAT |
| *PCM1* | Forward | | CTCTACACCCAGTGAACAGCAG |
| *PCM1* | Reverse | | CTGCTTTCCACCTCCTCTTCAG |
| *CETN2* | Forward | | CCAAGGAGTTGGGTGAGAACCT |
| *CETN2* | Reverse | | GCAGGAACTCTTGCTCACTGAC |
| *CAP350* | Forward | | CAAAGCAGCTCAGGTCCATGCA |
| *CAP350* | Reverse | | TCTGTGGTGAGGCGAGCAGTTT |
| *CEP152* | Forward | | GAGCCTTGGAAGAACTTCGTGG |
| *CEP152* | Reverse | | TGCAGCTCGTTCCTTACTCTCC |
| *CEP192* | Forward | | ACCGTCACTCTCACTGCCATTG |
| *CEP192* | Reverse | | AGGGCTTTCCAGCCTCCATAAG |
| *CEP120* | Forward | | GAGAGAAGGCATAGACTCCCAG |
| *CEP120* | Reverse | | GACTGGTTGTGAGATGGAACAGG |
| *EB1* | Forward | | TGTGGCTGCCAGACAAGGTCAA |
| *EB1* | Reverse | | GCAGCGGTTCTCTGTGTTGAGA |
| *NUMA1* | Forward | | GGTTCCAGGAAGAGAGGCAGAA |
| *NUMA1* | Reverse | | CTTGCTGGCTTGGTCAGAGTCA |
| *KIF3A* | Forward | | GTTTGGACTATGCTGATGGCTGC |
| *KIF3A* | Reverse | | GTTGCCGAATGTTCTCCAGTAGG |
| *DCTN1* | Forward | | CAATGTGGAGCCTCTCACCAAG |
| *DCTN1* | Reverse | | TCCTACCTCCACACTCATGCAG |
| *LIS1* | Forward | | GTACTGGCATGTGCCTTATGACC |
| *LIS1* | Reverse | | CGTAGGGTCTTGTCATCAGCAC |
| *NUDEL* | Forward | | GGCACAAAGTTCTCTCGATCAGG |
| *NUDEL* | Reverse | | CTCACACACTGAGAGGCAGCAT |
| *EGFR* | Forward | | AACACCCTGGTCTGGAAGTACG |
| *EGFR* | Reverse | | TCGTTGGACAGCCTTCAAGACC |
| *beta Actin* | Forward | | CACCATTGGCAATGAGCGGTTC |
| *beta Actin* | Reverse | | AGGTCTTTGCGGATGTCCACGT |

**Supplementary Table S2. siRNA sequences used in our research.**

| **siRNA** | **Sequences (5’-3’)** |
| --- | --- |
| siCAMSAP3 | CCGCCACCAUCCACUGCUA |

**Supplementary Table S3. shRNA sequences used in our research.**

| **shRNA** | **Sequences (5’-3’)** |
| --- | --- |
| shControl | GCAGTTATCTGGAAGATCAGG |
| shCAMSAP3 | GCTGATGGACGACCTCGATAA |

**Supplementary Table S4. Primer for plasmids sequences used in our research.**

| Plasmid | **Sequences (5’-3’)** | |
| --- | --- | --- |
| FLAG-CAMSAP3-FL | FLAG_*NheI*_ Forward | CTAGCTAGCATGGATTACAAGGATGACGACGATAAGgtggaggcggcgccc |
| *NOTI*_ Reverse | ATTTGCGGCCGCtcatttgggggtgccgcc |
| FLAG-CAMSAP3-△CH | FLAG_*NheI*_ Forward | CTAGCTAGCATGGATTACAAGGATGACGACGATAAGtttgcagaacgcaaga |
| *NOTI*_ Reverse | ATTTGCGGCCGCtcatttgggggtgccgcc |
| FLAG-CAMSAP3-△HCKK | FLAG_*NheI*_ Forward | CTAGCTAGCATGGATTACAAGGATGACGACGATAAGgtggaggcggcgccc |
| *NOTI*_ Reverse | ATTTGCGGCCGCtcactccagcaggctggcc |
| FLAG-CAMSAP3-HCKK | FLAG_*NheI*_ Forward | CTAGCTAGCATGGATTACAAGGATGACGACGATAAGcggcagcagcggcga |
| *NOTI*_ Reverse | ATTTGCGGCCGCtcatttgggggtgccgcc |
