# Supplementary figures and images for: NSCLC cells acquire resistance to AZD9291 by reducing CAMSAP3
Source: Research Square preprint supplement (doi:10.21203/rs.3.rs-6539573/v1), 2025-05-21

Fig2B:


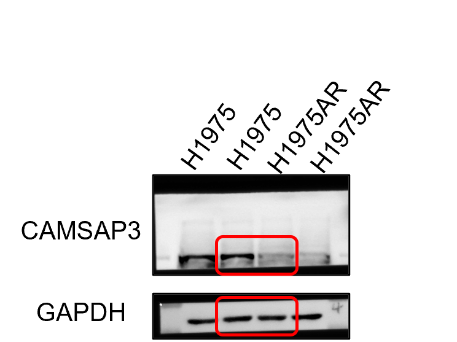


Fig3A:


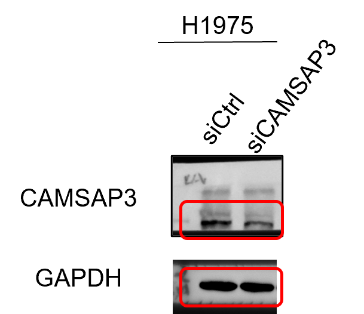


Fig4B


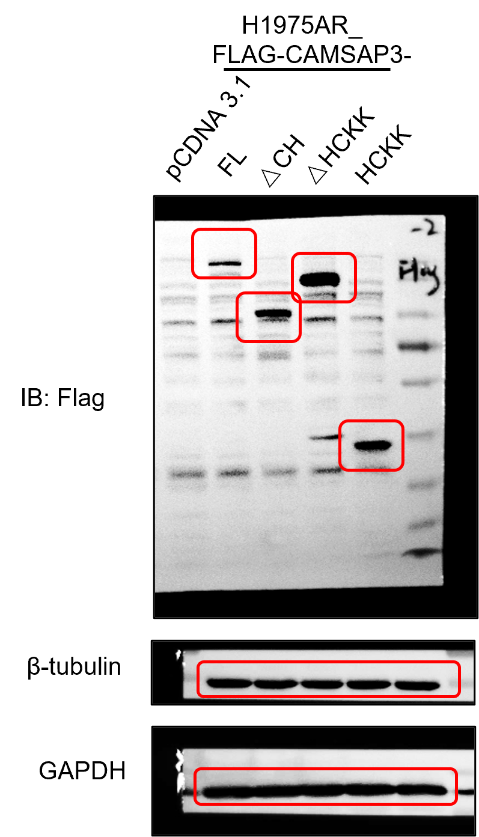


Fig5B:


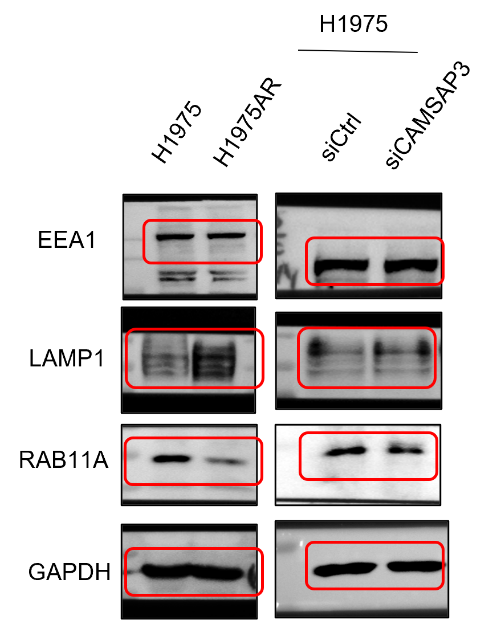


Fig5E:


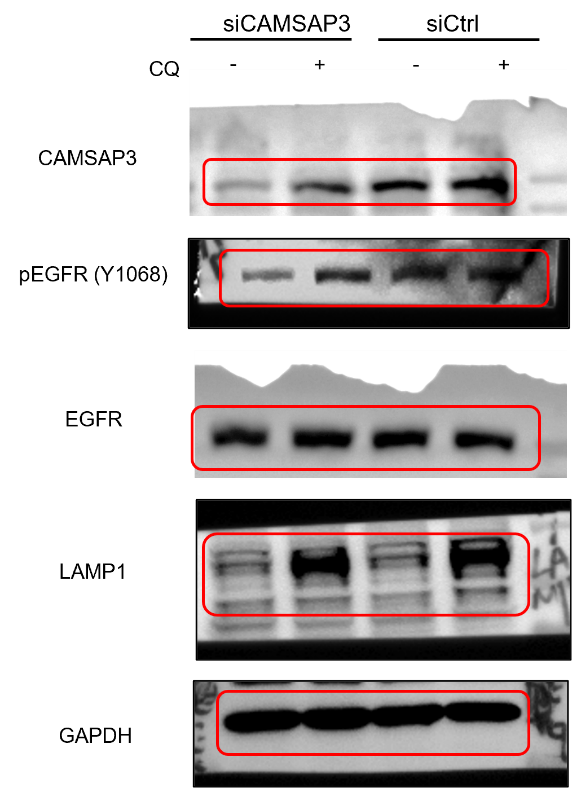


Fig6B:


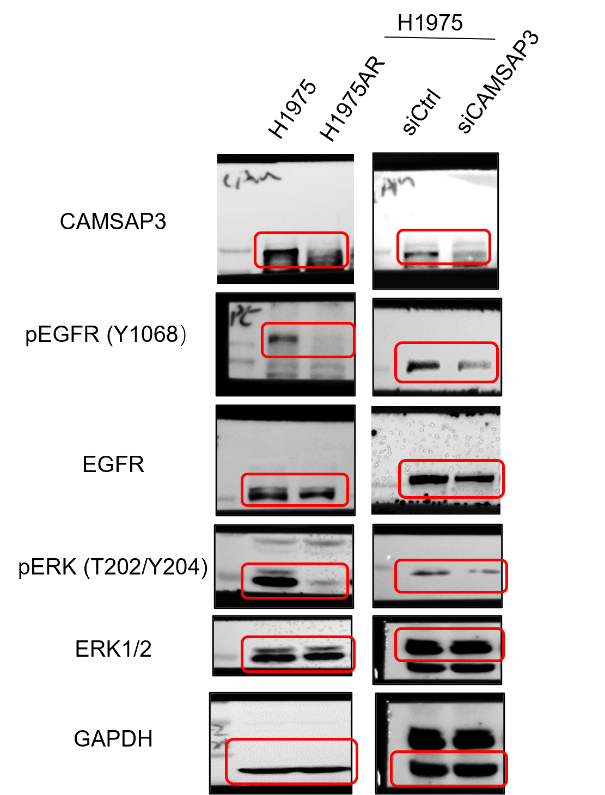


FigS2B:


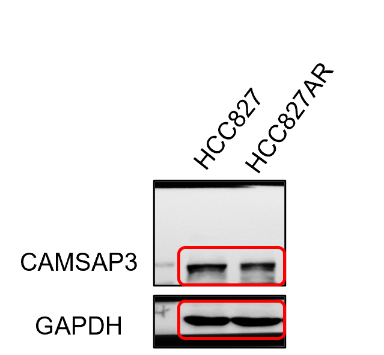


FigS3A:


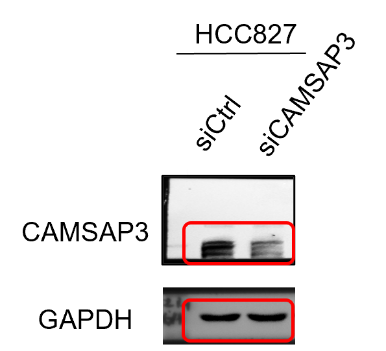


FigS3E:


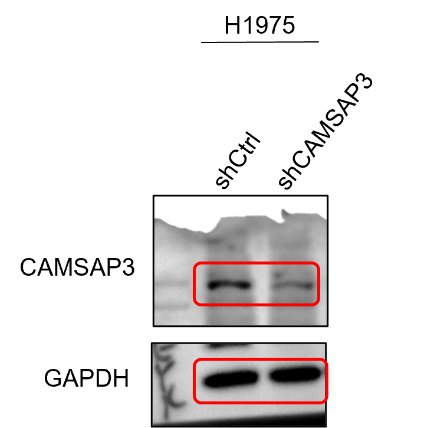


FigS4D:


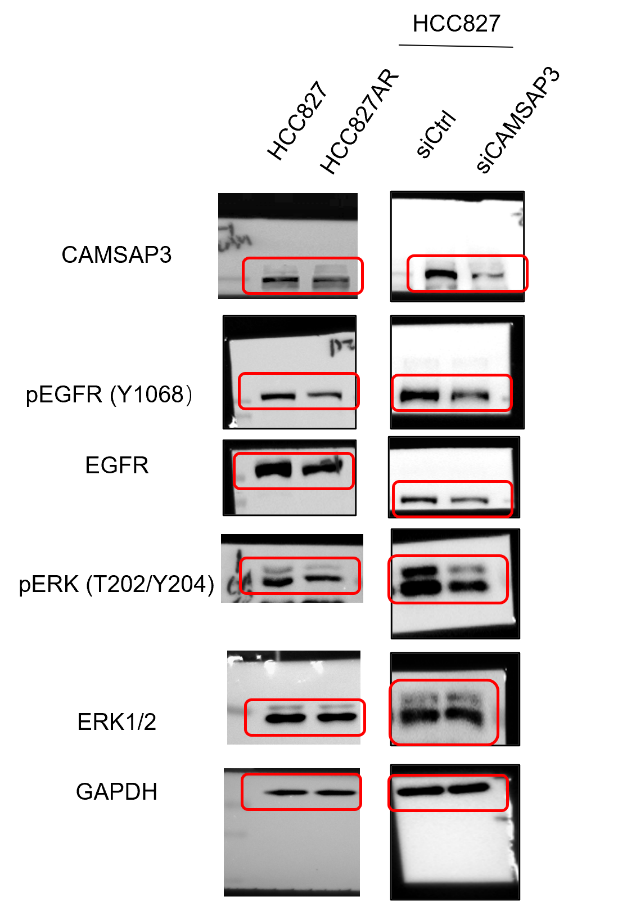


FigS5B:


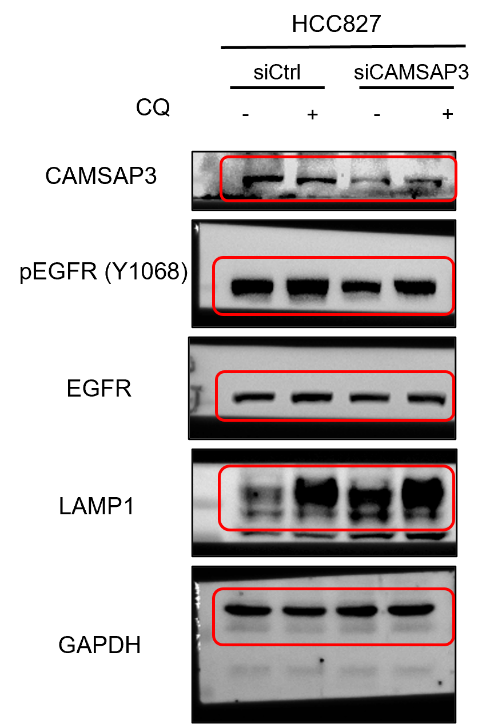

Supplement: Supplementary file 1 [file 10bc90d4e7d68d686039b3fa.docx]
